# Supplementary material for: Acalabrutinib Versus Investigator’s Choice in Relapsed/Refractory Chronic Lymphocytic Leukemia: Final ASCEND Trial Results
Source: PubMed Central journal article supplement — Hemasphere. 2022 Nov 14;6(12):e801. doi: 10.1097/HS9.0000000000000801 (PMC9666115; doi:10.1097/hs9.0000000000000801), 2022-11-14
Supplement: hs9-6-e801-s001.pdf [file hs9-6-e801-s001.pdf]

## Supplemental Digital Content

**SDC, Table 1.** Subsequent anticancer therapies<sup>a</sup>

|                                                            | <b>Acalabrutinib<br/>(n=155)</b> | <b>IdR/BR<br/>(n=155)</b> | <b>Total<br/>(n=310)</b> |
|------------------------------------------------------------|----------------------------------|---------------------------|--------------------------|
| Number of subsequent anticancer therapies, n (%)           |                                  |                           |                          |
| 1                                                          | 27 (17.4)                        | 29 (18.7)                 | 56 (18.1)                |
| 2                                                          | 8 (5.2)                          | 5 (3.2)                   | 13 (4.2)                 |
| 3                                                          | 1 (0.6)                          | 2 (1.3)                   | 3 (1.0)                  |
| ≥4                                                         | 2 (1.3)                          | 0                         | 2 (0.6)                  |
| Median                                                     | 1                                | 1                         | 1                        |
| Range                                                      | 1–4                              | 1–3                       | 1–4                      |
| Subsequent anticancer therapy category, <sup>b</sup> n (%) |                                  |                           |                          |
| Acalabrutinib                                              | 1 (0.6)                          | 1 (0.6)                   | 2 (0.6)                  |
| Alkylators other than bendamustine                         | 11 (7.1)                         | 12 (7.7)                  | 23 (7.4)                 |
| Anti-CD20 monoclonal antibody                              | 14 (9.0)                         | 10 (6.5)                  | 24 (7.7)                 |
| Bendamustine                                               | 2 (1.3)                          | 3 (1.9)                   | 5 (1.6)                  |
| Bleomycin                                                  | 0                                | 1 (0.6)                   | 1 (0.3)                  |
| Doxorubicin                                                | 5 (3.2)                          | 7 (4.5)                   | 12 (3.9)                 |
| Etoposide                                                  | 2 (1.3)                          | 1 (0.6)                   | 3 (1.0)                  |

|                           |           |          |          |
|---------------------------|-----------|----------|----------|
| Ibrutinib                 | 6 (3.9)   | 7 (4.5)  | 13 (4.2) |
| Mitoxantrone              | 1 (0.6)   | 0        | 1 (0.3)  |
| Other BTKi                | 3 (1.9)   | 1 (0.6)  | 4 (1.3)  |
| Platinum-based regimens   | 2 (1.3)   | 1 (0.6)  | 3 (1.0)  |
| Purine analogues          | 2 (1.3)   | 1 (0.6)  | 3 (1.0)  |
| Rituximab                 | 14 (9.0)  | 11 (7.1) | 25 (8.1) |
| Steroids                  | 9 (5.8)   | 7 (4.5)  | 16 (5.2) |
| Venetoclax                | 16 (10.3) | 14 (9.0) | 30 (9.7) |
| Vinca and other alkaloids | 6 (3.9)   | 6 (3.9)  | 12 (3.9) |
| Other                     | 3 (1.9)   | 1 (0.6)  | 4 (1.3)  |

---

<sup>a</sup>Based on main study period + crossover study period.

<sup>b</sup>Three subjects received subsequent therapy for non-CLL malignancies of myelodysplastic syndrome/acute myeloid leukemia (1 subject received azacitidine and cytarabine + idarubicin) and lung cancer (1 subject received cisplatin + vinorelbine and 1 subject received carboplatin + etoposide).

BTKi, Bruton tyrosine kinase inhibitor; BR, bendamustine plus rituximab; IdR, idelalisib plus rituximab.

**SDC, Table 2.** TEAEs of any grade leading to treatment discontinuation

| TEAEs, n (%)                        | Acalabrutinib<br>(n=154) | IdR (n=118) |           | BR (n=35) |          |
|-------------------------------------|--------------------------|-------------|-----------|-----------|----------|
|                                     |                          | Id          | R         | B         | R        |
| Patients with ≥1 TEAE               |                          |             |           |           |          |
| leading to study drug               | 36 (23.4)                | 76 (64.4)   | 16 (13.6) | 4 (11.4)  | 6 (17.1) |
| discontinuation                     |                          |             |           |           |          |
| COVID-19 pneumonia                  | 3 (1.9)                  | 0           | 0         | 0         | 0        |
| Metastatic squamous cell carcinoma  | 2 (1.3)                  | 0           | 0         | 0         | 0        |
| Pneumonia                           | 2 (1.3)                  | 4 (3.4)     | 3 (2.5)   | 0         | 0        |
| Squamous cell carcinoma of skin     | 2 (1.3)                  | 0           | 0         | 0         | 0        |
| Abdominal pain                      | 1 (0.6)                  | 0           | 0         | 0         | 0        |
| Alanine aminotransferase increased  | 1 (0.6)                  | 4 (3.4)     | 0         | 0         | 0        |
| Anemia of malignant disease         | 1 (0.6)                  | 0           | 0         | 0         | 0        |
| Aortic aneurysm                     | 1 (0.6)                  | 0           | 0         | 0         | 0        |
| Bladder transitional cell carcinoma | 1 (0.6)                  | 0           | 0         | 0         | 0        |
| Brain abscess                       | 1 (0.6)                  | 0           | 0         | 0         | 0        |

|                               |         |         |   |         |         |
|-------------------------------|---------|---------|---|---------|---------|
| Brain neoplasm                | 1 (0.6) | 0       | 0 | 0       | 0       |
| Brain neoplasm<br>malignant   | 1 (0.6) | 0       | 0 | 0       | 0       |
| Bronchitis                    | 1 (0.6) | 0       | 0 | 1 (2.9) | 1 (2.9) |
| Cardiac failure<br>congestive | 1 (0.6) | 0       | 0 | 0       | 0       |
| Cytopenia                     | 1 (0.6) | 0       | 0 | 0       | 0       |
| Dehydration                   | 1 (0.6) | 0       | 0 | 0       | 0       |
| Hematuria                     | 1 (0.6) | 0       | 0 | 0       | 0       |
| Headache                      | 1 (0.6) | 0       | 0 | 0       | 0       |
| Hemiparesis                   | 1 (0.6) | 0       | 0 | 0       | 0       |
| Hepatitis B                   | 1 (0.6) | 0       | 0 | 0       | 0       |
| Hepatitis C                   | 1 (0.6) | 0       | 0 | 0       | 0       |
| Immune<br>thrombocytopenia    | 1 (0.6) | 0       | 0 | 0       | 0       |
| Lung neoplasm malignant       | 1 (0.6) | 0       | 0 | 0       | 0       |
| Nasopharyngeal cancer         | 1 (0.6) | 0       | 0 | 0       | 0       |
| Neutropenia                   | 1 (0.6) | 1 (0.8) | 0 | 0       | 0       |
| Peritonitis                   | 1 (0.6) | 0       | 0 | 0       | 0       |
| Prostate cancer               | 1 (0.6) | 0       | 0 | 0       | 0       |
| Pulmonary mass                | 1 (0.6) | 0       | 0 | 0       | 0       |
| Rash muscular                 | 1 (0.6) | 0       | 0 | 0       | 0       |

|                                                                       |         |           |         |   |         |
|-----------------------------------------------------------------------|---------|-----------|---------|---|---------|
| Respiratory failure                                                   | 1 (0.6) | 0         | 0       | 0 | 0       |
| Respiratory tract infection                                           | 1 (0.6) | 0         | 0       | 0 | 0       |
| Sudden death, not<br>otherwise specified                              | 1 (0.6) | 0         | 0       | 0 | 0       |
| Diarrhea                                                              | 0       | 19 (16.1) | 0       | 0 | 0       |
| Colitis                                                               | 0       | 5 (4.2)   | 0       | 0 | 0       |
| Pneumonitis                                                           | 0       | 4 (3.4)   | 1 (0.8) | 0 | 0       |
| Transaminases increased<br>Aspartate<br>aminotransferase<br>increased | 0       | 4 (3.4)   | 1 (0.8) | 0 | 0       |
| Interstitial lung disease                                             | 0       | 3 (2.5)   | 0       | 0 | 0       |
| Hepatotoxicity                                                        | 0       | 3 (2.5)   | 1 (0.8) | 0 | 1 (2.9) |
| Neutrophil count<br>decreased                                         | 0       | 2 (1.7)   | 0       | 0 | 0       |
| Rash maculopapular                                                    | 0       | 2 (1.7)   | 0       | 0 | 0       |
| Thrombocytopenia                                                      | 0       | 2 (1.7)   | 1 (0.8) | 0 | 0       |
| COVID-19                                                              | 0       | 2 (1.7)   | 0       | 0 | 0       |
| Cardiac failure chronic                                               | 0       | 1 (0.8)   | 0       | 0 | 0       |
| Cardiopulmonary failure                                               | 0       | 1 (0.8)   | 1 (0.8) | 0 | 0       |
| Cytomegalovirus infection<br>reactivation                             | 0       | 1 (0.8)   | 0       | 0 | 0       |

|                                                        |   |         |         |   |   |
|--------------------------------------------------------|---|---------|---------|---|---|
| Dyspepsia                                              | 0 | 1 (0.8) | 0       | 0 | 0 |
| Dyspnea                                                | 0 | 1 (0.8) | 0       | 0 | 0 |
| Enterocolitis                                          | 0 | 1 (0.8) | 0       | 0 | 0 |
| Epstein-Barr virus–<br>positive mucocutaneous<br>ulcer | 0 | 1 (0.8) | 0       | 0 | 0 |
| Esophagitis                                            | 0 | 1 (0.8) | 0       | 0 | 0 |
| Hepatic cytolysis                                      | 0 | 1 (0.8) | 0       | 0 | 0 |
| Hepatic enzyme<br>increased                            | 0 | 1 (0.8) | 0       | 0 | 0 |
| Hepatitis B DNA assay<br>positive                      | 0 | 1 (0.8) | 0       | 0 | 0 |
| Hepatitis E                                            | 0 | 1 (0.8) | 0       | 0 | 0 |
| Liver injury                                           | 0 | 1 (0.8) | 0       | 0 | 0 |
| Myocardial infection                                   | 0 | 1 (0.8) | 0       | 0 | 0 |
| Pain in extremity                                      | 0 | 1 (0.8) | 1 (0.8) | 0 | 0 |
| Pneumocystis jirovecii<br>pneumonia                    | 0 | 1 (0.8) | 0       | 0 | 0 |
| Pneumonia legionella                                   | 0 | 1 (0.8) | 1 (0.8) | 0 | 0 |
| Pneumonia<br>pneumococcal                              | 0 | 1 (0.8) | 0       | 0 | 0 |
| Pruritus                                               | 0 | 1 (0.8) | 0       | 0 | 0 |

|                           |   |         |         |         |         |
|---------------------------|---|---------|---------|---------|---------|
| Sepsis                    | 0 | 1 (0.8) | 0       | 0       | 0       |
| Septic shock              | 0 | 1 (0.8) | 1 (0.8) | 0       | 0       |
| Urinary tract infection   | 0 | 1 (0.8) | 0       | 0       | 0       |
| Vertigo                   | 0 | 1 (0.8) | 1 (0.8) | 0       | 0       |
| Gastroenteritis           | 0 | 0       | 1 (0.8) | 0       | 0       |
| Infusion-related reaction | 0 | 0       | 1 (0.8) | 0       | 0       |
| Organizing pneumonia      | 0 | 0       | 1 (0.8) | 0       | 0       |
| Rash pustular             | 0 | 0       | 1 (0.8) | 0       | 0       |
| Urosepsis                 | 0 | 0       | 1 (0.8) | 0       | 0       |
| Adenocarcinoma gastric    | 0 | 0       | 0       | 1 (2.9) | 1 (2.9) |
| Hemolytic anemia          | 0 | 0       | 0       | 1 (2.9) | 0       |
| Cardiac failure acute     | 0 | 0       | 0       | 0       | 1 (2.9) |
| Hepatitis B reactivation  | 0 | 0       | 0       | 1 (2.9) | 1 (2.9) |
| Urticaria                 | 0 | 0       | 0       | 0       | 1 (2.9) |

AEs were graded according to the Common Toxicity Criteria of the National Cancer Institute, version 4.03 and reported until 30 days after the last dose of study drug or at documented disease progression, whichever was longer. Data for AEs leading to treatment discontinuation were captured from the AE case report form.

AE, adverse event; B, bendamustine; BR, bendamustine plus rituximab; Id, idelalisib; IdR, idelalisib plus rituximab; R, rituximab; TEAE, treatment-emergent adverse event.

**SDC Table 3.** Outcomes in patients who discontinued treatment

|                                                      | Discontinued due to AEs |               | Discontinued due to PD |                 |
|------------------------------------------------------|-------------------------|---------------|------------------------|-----------------|
|                                                      | Acala (n=36)            | IdR/BR (n=85) | Acala (n=34)           | IdR/BR (n=26)   |
| Events, n (%)                                        | 28 (78)                 | 67 (79)       | 30 (88)                | 26 (100)        |
| Death                                                | 19 (53)                 | 15 (18)       | 3 (9)                  | 0               |
| Start of crossover therapy                           | 0                       | 41 (48)       | 0                      | 24 (92)         |
| Start of subsequent anticancer therapy               | 9 (25)                  | 11 (13)       | 27 (79)                | 2 (8)           |
| Censored, n (%)                                      | 8 (22)                  | 18 (21)       | 4 (12)                 | 0               |
| Alive and no crossover/subsequent anticancer therapy | 8 (22)                  | 18 (21)       | 4 (12)                 | 0               |
| Median TTNT, mo (range)                              | 21.2 (2–NR)             | 17.7 (0.8–NR) | 28.6 (2.1–NR)          | 15.8 (4.2–46.6) |
| HR (95% CI)                                          | 0.66 (0.40, 1.10)       |               | 0.43 (0.23, 0.79)      |                 |
| <i>P</i> -value                                      | 0.1067                  |               | 0.0052                 |                 |

AE, adverse event; BR, bendamustine plus rituximab; CI, confidence interval; HR, hazard ratio; IdR, idelalisib plus rituximab; NR, not reached; PD, progressive disease; TTNT, time to next treatment.



**SDC, Table 4.** Summary of treatment-emergent grade  $\geq 3$  infections

| Type of Infection, n (%)                         | Acalabrutinib<br>(n=154) | IdR<br>(n=118) | BR<br>(n=35) |
|--------------------------------------------------|--------------------------|----------------|--------------|
| Pneumonia, upper respiratory, and<br>respiratory |                          |                |              |
| Upper respiratory tract infection                | 3 (1.9)                  | 4 (3.4)        | 1 (2.9)      |
| Pneumonia                                        | 15 (9.7)                 | 12 (10.2)      | 1 (2.9)      |
| Respiratory tract infection                      | 2 (1.3)                  | 2 (1.7)        | 0            |
| Bronchitis                                       | 2 (1.3)                  | 1 (0.8)        | 1 (2.9)      |
| Bronchitis pneumococcal                          | 0                        | 1 (0.8)        | 0            |
| Infective exacerbation of<br>bronchiectasis      | 0                        | 1 (0.8)        | 0            |
| Influenza                                        | 1 (0.6)                  | 2 (1.7)        | 1 (2.9)      |
| Pneumonia pneumococcal                           | 0                        | 5 (4.2)        | 0            |
| Pneumonia legionella                             | 0                        | 1 (0.8)        | 0            |
| Pneumonia pseudomonal                            | 0                        | 1 (0.8)        | 0            |
| Pneumonia hemophilus                             | 0                        | 1 (0.8)        | 0            |
| Pneumonia klebsiella                             | 1 (0.6)                  | 0              | 0            |
| Lower respiratory tract infection                | 0                        | 2 (1.7)        | 0            |
| COVID-19                                         | 3 (1.9)                  | 1 (0.8)        | 0            |
| COVID-19 pneumonia                               | 6 (3.9)                  | 1 (0.8)        | 0            |
| Fungal infections                                |                          |                |              |

|                                        |         |         |         |
|----------------------------------------|---------|---------|---------|
| Pneumonia fungal                       | 1 (0.6) | 0       | 0       |
| Pneumocystis jirovecii<br>pneumonia    | 1 (0.6) | 1 (0.8) | 0       |
| Sepsis                                 |         |         |         |
| Sepsis                                 | 1 (0.6) | 1 (0.8) | 0       |
| Pseudomonal sepsis                     | 1 (0.6) | 1 (0.8) | 0       |
| Septic shock                           | 0       | 1 (0.8) | 0       |
| Gastrointestinal                       |         |         |         |
| Gastroenteritis                        | 1 (0.6) | 1 (0.8) | 0       |
| Clostridium difficile colitis          | 0       | 1 (0.8) | 0       |
| Gastroenteritis viral                  | 0       | 0       | 1 (2.9) |
| Kidney and bladder                     |         |         |         |
| Urinary tract infection                | 3 (1.9) | 2 (1.7) | 0       |
| Escherichia urinary tract<br>infection | 1 (0.6) | 1 (0.8) | 0       |
| Escherichia sepsis                     | 1 (0.6) | 0       | 0       |
| Urosepsis                              | 0       | 1 (0.8) |         |
| Eye, ear and mouth                     |         |         |         |
| Otitis media                           | 1 (0.6) | 0       | 0       |
| Ophthalmic herpes zoster               | 1 (0.6) | 0       | 0       |
| Other                                  |         |         |         |
| Sinusitis                              | 2 (1.3) | 0       | 0       |

|                                              |         |         |   |
|----------------------------------------------|---------|---------|---|
| Cytomegalovirus infection                    | 0       | 1 (0.8) | 0 |
| Cytomegalovirus infection<br>reactivation    | 0       | 1 (0.8) | 0 |
| Cytomegalovirus viremia                      | 0       | 1 (0.8) | 0 |
| Hemophilus infection                         | 0       | 1 (0.8) | 0 |
| Epididymitis                                 | 1 (0.6) | 0       | 0 |
| Infection                                    | 0       | 1 (0.8) | 0 |
| Encephalitis viral                           | 0       | 1 (0.8) | 0 |
| Herpes zoster                                | 1 (0.6) | 3 (2.5) | 0 |
| Hepatitis E                                  | 0       | 1 (0.8) | 0 |
| Herpes zoster reactivation                   | 1 (0.6) | 0       | 0 |
| Herpes dermatitis                            | 0       | 1 (0.8) | 0 |
| Pseudomonas infection                        | 0       | 1 (0.8) | 0 |
| Peritonitis                                  | 1 (0.6) | 0       | 0 |
| Cellulitis                                   | 1 (0.6) | 0       | 0 |
| Diverticulitis                               | 1 (0.6) | 0       | 0 |
| Epstein-Barr virus infection<br>reactivation | 1 (0.6) | 0       | 0 |
| Hepatitis B                                  | 1 (0.6) | 0       | 0 |
| Device-related infection                     | 1 (0.6) | 0       | 0 |
| Postoperative wound infection                | 1 (0.6) | 0       | 0 |
| Appendicitis                                 | 1 (0.6) | 0       | 0 |

Brain abscess

1 (0.6)

0

0

---

BR, bendamustine plus rituximab; IdR, idelalisib plus rituximab.

**SDC, Table 5.** TEAEs with a fatal outcome (grade 5)

| TEAE, n (%)                              | Acalabrutinib<br>(n=154) | IdR<br>(n=118) | BR<br>(n=35) |
|------------------------------------------|--------------------------|----------------|--------------|
| Subjects with ≥1 fatal TEAE              | 16 (10.4)                | 9 (7.6)        | 2 (5.7)      |
| Brain neoplasm                           | 1 (0.6)                  | 0              | 0            |
| Brain neoplasm malignant                 | 1 (0.6)                  | 0              | 0            |
| Bronchitis                               | 1 (0.6)                  | 0              | 0            |
| COVID-19                                 | 1 (0.6)                  | 1 (0.8)        | 0            |
| COVID-19 pneumonia                       | 1 (0.6)                  | 0              | 0            |
| Cachexia                                 | 1 (0.6)                  | 0              | 0            |
| Cardiorespiratory arrest                 | 1 (0.6)                  | 0              | 0            |
| Cardiopulmonary failure                  | 1 (0.6)                  | 2 (1.7)        | 0            |
| Cerebral ischemia                        | 1 (0.6)                  | 0              | 0            |
| Lung neoplasm malignant                  | 1 (0.6)                  | 0              | 0            |
| Nasopharyngeal cancer                    | 1 (0.6)                  | 0              | 0            |
| Neuroendocrine<br>carcinoma              | 1 (0.6)                  | 0              | 0            |
| Pneumonia                                | 1 (0.6)                  | 0              | 0            |
| Respiratory failure                      | 1 (0.6)                  | 0              | 0            |
| Sepsis                                   | 1 (0.6)                  | 1 (0.8)        | 0            |
| Sudden death, not<br>otherwise specified | 1 (0.6)                  | 0              | 0            |

|                           |   |         |         |
|---------------------------|---|---------|---------|
| Adenocarcinoma gastric    | 0 | 0       | 1 (2.9) |
| Cardiac failure acute     | 0 | 0       | 1 (2.9) |
| Cardiac failure chronic   | 0 | 1 (0.8) | 0       |
| Interstitial lung disease | 0 | 1 (0.8) | 0       |
| Myocardial infarction     | 0 | 1 (0.8) | 0       |
| Pneumonia pseudomonal     | 0 | 1 (0.8) | 0       |
| Pneumonitis               | 0 | 1 (0.8) | 0       |

---

AEs were graded according to the Common Toxicity Criteria of the National Cancer Institute, version 4.03 and reported until 30 days after the last dose of study drug or at documented disease progression, whichever was longer.

BR, bendamustine plus rituximab; IdR, idelalisib plus rituximab; TEAE, treatment-emergent adverse event.

## **SDC, Plain Language Summary**

### ***Why was this study done?***

Until recently, the standard-of-care treatment for chronic lymphocytic leukemia (CLL) was chemoimmunotherapy, which combines immune-based treatments with traditional chemotherapy and is often toxic to the patient. Acalabrutinib is a newer oral therapy that selectively inhibits a protein called Bruton tyrosine kinase (BTK), which plays a role in worsening of disease in patients with CLL. ASCEND is a phase 3 study in patients with CLL who either relapsed after or stopped responding to previous treatments. It showed that after monitoring patients on treatment for 16.1 months, as well as after ~3 years, acalabrutinib treatment alone (monotherapy) yielded better responses and was safer compared with combination therapy with either chemoimmunotherapy or a nonchemotherapy-based drug combination. Here, we report the results of the ASCEND study after ~4 years of treatment.

### ***How were the data collected?***

Response to treatment (efficacy) and symptoms related to treatment (safety) were collected for a group of patients receiving only acalabrutinib and compared with two other patient groups. The two other patient groups received combination therapies, either chemoimmunotherapy (bendamustine plus rituximab) or a nonchemotherapy-based combination (idelalisib plus rituximab).

***What were the results?***

After ~4 years of treatment, more patients who were treated with acalabrutinib survived longer without worsening (progression) of disease compared with the combination regimens. After ~4 years of treatment, patients treated with acalabrutinib continued to have good responses and good overall survival, and the drug safety profile was sustained.

***Why do the results matter to patients and physicians?***

These results confirm that long-term acalabrutinib treatment as a chemotherapy-free regimen continues to be efficacious and safe for patients with CLL who either relapsed after or stopped responding to previous treatments.
